# Supplementary material
Source: Springer Nature journal article supplement (https://www.springermedizin.de/resource/supplementary/12889_2011_3840_MOESM4_ESM.PDF/9492268)
Supplement: MOESM4 [file 9492268]

### Third questionnaire

The questionnaire was originally in Dutch and has been translated into English

Some time ago you filled in a questionnaire in which you indicated that you might want to do a ... [dynamic representation] self-test in the future. We would like to ask you some further questions.

**1. In the past 3 months, did you do a self-test (that is, a test on your blood or urine which you did or had done, without a doctor being involved)?** (if yes, multiple answers allowed)

- ☐ Yes, a diabetes self-test
- ☐ Yes, a cholesterol self-test
- ☐ Yes, another self-test
- ☐ No

**2. Did the information you received about self-tests cause you to consult a doctor during the past 3 months?**

- ☐ Yes
- ☐ No

**3. Did the information you received about self-tests cause you to seek other professional help (such as a nurse or nurse practitioner)?**

- ☐ Yes
- ☐ No

**4. Did the information you received about self-tests cause you to change your lifestyle in the past 3 months? (multiple answers allowed)**

- ☐ Yes, I've started to take more exercise
- ☐ Yes, I've stopped smoking
- ☐ Yes, I've started to eat healthier food
- ☐ Yes, I've reduced my alcohol intake
- ☐ Yes, other: .....
- ☐ No

If yes is ticked at question 1, respondent is referred to question 5 for each test (diabetes or cholesterol); if no or 'another test' is ticked at question 1, respondent is referred to question 6.

**5a. What was the main reason for you to do a [dynamic representation] self-test?**

- ☐ Because I had a medical complaint
- ☐ Because I was worried I might have a disease
- ☐ Because other people advised me to take the test
- ☐ Because the test was recommended in a campaign
- ☐ Because people in my immediate environment had the disease
- ☐ Because I had had the test before and wanted to know if anything had changed
- ☐ Because I wanted to know more about my health status
- ☐ Because the test was offered to me (free of charge)
- ☐ Other, namely .....

**5b. Why did you decide to take a self-test instead of visiting your family doctor?** (multiple answers allowed)

- Because such a test ensures privacy
- Because you get the results quickly
- Because the test was offered to me (free of charge)
- Because I wanted to take responsibility for my own health
- Because I previously asked my doctor to do the test but it was never done
- Other, namely.....

**5c. What was the result of the self-test?**

- Normal (nothing wrong)
- Abnormal (something wrong)
- Inconclusive
- Test failed
- Can't remember
- I prefer not to answer this question

**5d. Were you reassured by the result of this self-test?**

- Not at all reassured
- Not reassured
- Neutral
- Reassured
- Completely reassured

**5e. What did you do after you got the test result? (multiple answers allowed)**

- I took no further action.
- I discussed the test result with relatives or friends.
- I looked for further information.
- I did a self-test for other diseases or risk factors.
- I changed my lifestyle.
- I bought over-the-counter drugs (such as vitamins or pills).
- I sought help from complementary medicine (such as acupuncture or homeopathy).
- I consulted a doctor.
- I consulted another care provider (such as a dietician, a psychologist, a physiotherapist, my GP's receptionist or a nurse practitioner).
- Other

**5f. You indicated that you might want to do a [dynamic representation] self-test in the future, and you have since actually done so. Would you do another [dynamic representation] self-test in the future?**

- ☐ Definitely not (respondent is referred to question 7)
- ☐ Probably not (respondent is referred to question 7)
- ☐ Perhaps
- ☐ Probably
- ☐ Definitely

**If the Perhaps is ticked at question 5f, respondent is referred to question 5g.**

**5g. When would you [perhaps / probably / definitely; tailored on the basis of question 5a) think of doing this self-test?**

- ☐ Within the next month
- ☐ Within the next 6 months (but not within the next month)
- ☐ Within the next year (but not within the next 6 months)
- ☐ Within the next 5 years (but not within the next year)
- ☐ Some time in the future (but not within the next 5 years)
- ☐ None of the above

**5h. According to you, what are the chances that you will develop .... [dynamic representation]?**

- ☐ Very high
- ☐ High
- ☐ Not high / not low
- ☐ Low
- ☐ Very low
- ☐ I already have diabetes (respondents are referred to question 11)

**5i. According to you, what are the chances that you will develop .... [dynamic representation] compared to others of your age and gender?**

- ☐ Much larger
- ☐ Larger
- ☐ Equally large / small
- ☐ Smaller
- ☐ Much smaller

**5j. To what extent do you feel worried about developing [dynamische weergave] in the future?**

- ☐ Not worried at all
- ☐ Not worried
- ☐ Neutral
- ☐ Worried
- ☐ Very Worried

**Only for those respondents who ticked No or 'other test' at question 1**

**6a. You indicated before that you might want to do a [dynamic representation] self-test in the future. Do you still intend to do this self-test in the future?**

- ☐ Definitely not (respondent is referred to question 7)
- ☐ Probably not (respondent is referred to question 7)
- ☐ Perhaps
- ☐ Probably
- ☐ Definitely

**If Perhaps–Definitely is ticked at question 6a, respondent is referred to question 6b.**

**6b. When would you want to do this self-test?**

- ☐ Within the next month

- Within the next 6 months (but not within the next month)
- Within the next year (but not within the next 6 months)
- Within the next 5 years (but not within the next year)
- Some time in the future (but not within the next 5 years)
- None of the above

**All respondents:**

**7. Do you intend to consult a doctor because you have questions about [dynamic representation]?**

- ☐ Definitely not
- ☐ Probably not
- ☐ Perhaps
- ☐ Probably
- ☐ Definitely

**This is the end of the questionnaire.  
Thank you very much for your cooperation!**

**Please click NEXT to submit the questionnaire.**
